# Supplementary material for: Detection of Meteoritic Amino Acids in Extremely Small Sample Sizes: Implications for Sample Return Missions
Source: Preprints.org preprint supplement (doi:10.20944/preprints202302.0374.v1), 2023-02-22

**Figure S1a.** Tandem Mass Spectrometry (MS<sup>2</sup>) data for **glycine** (as an isopropyl ester)

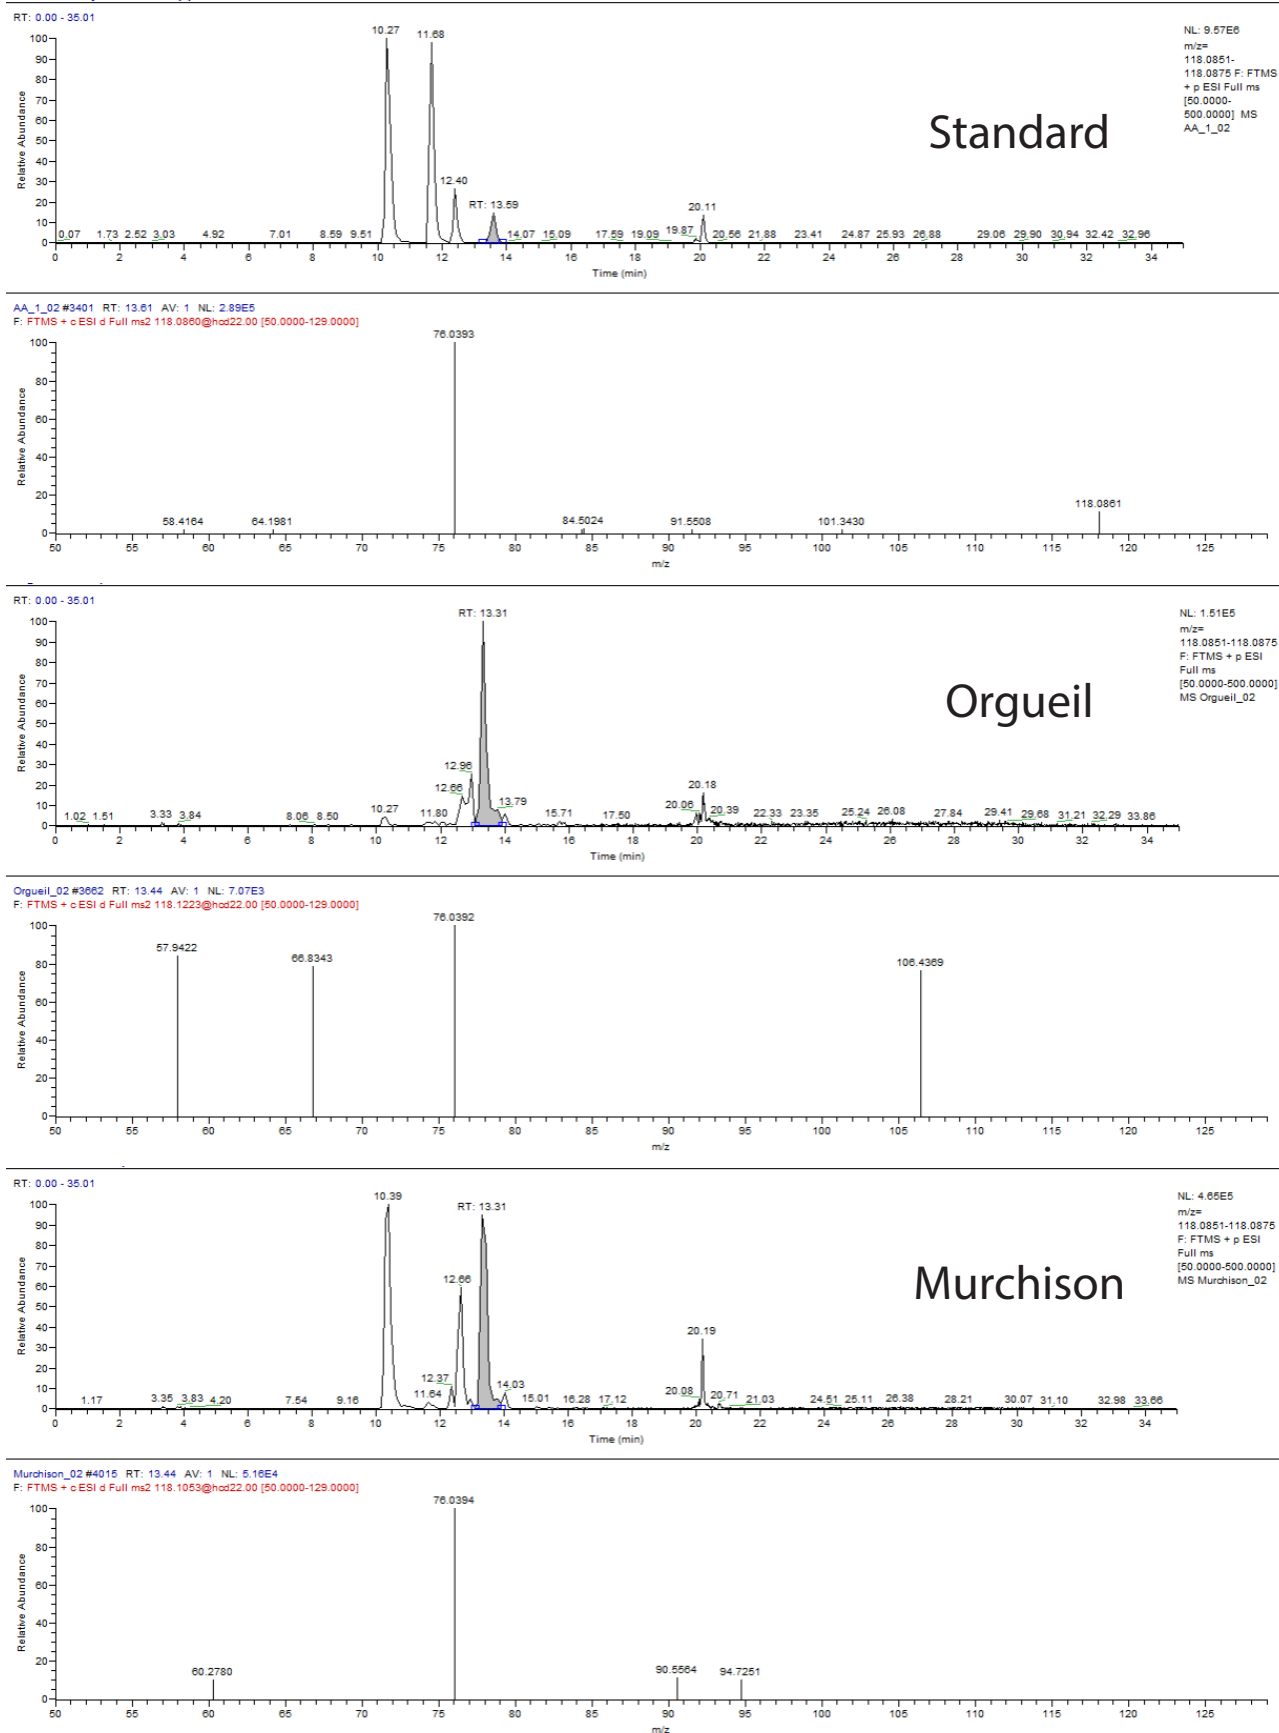

## Figure S1b. Tandem Mass Spectrometry (MS<sup>2</sup>) data for $\beta$ -Alanine (as an isopropyl ester)

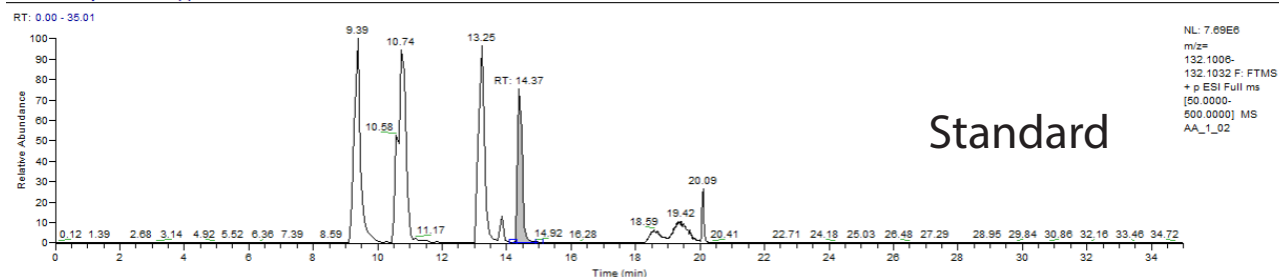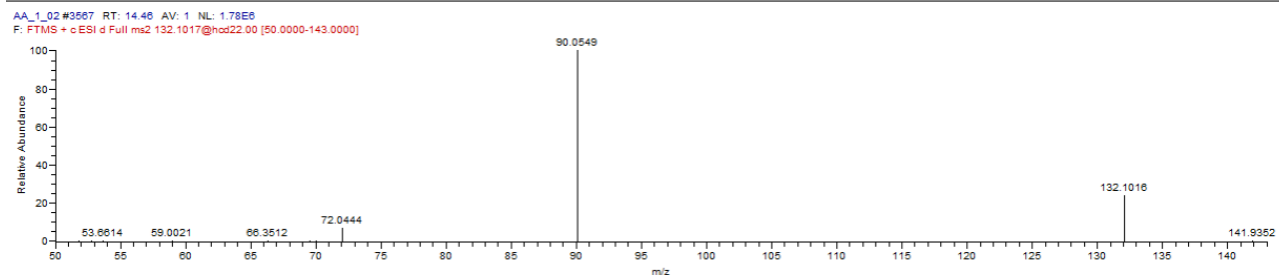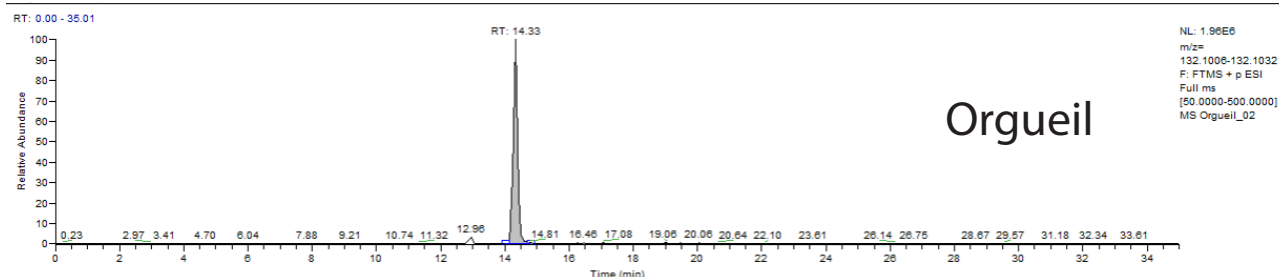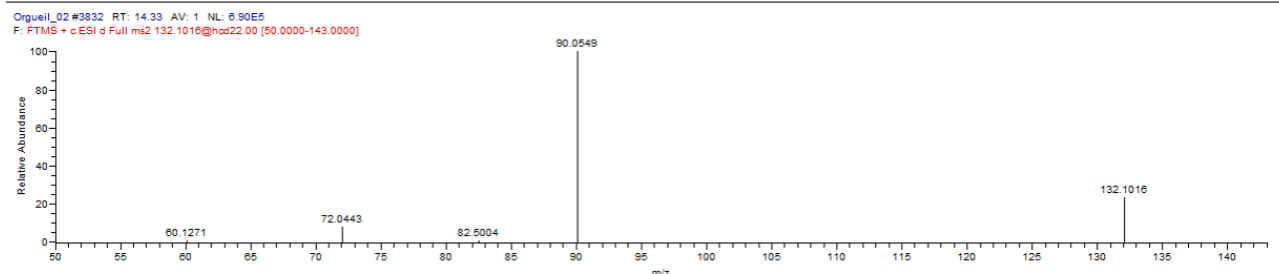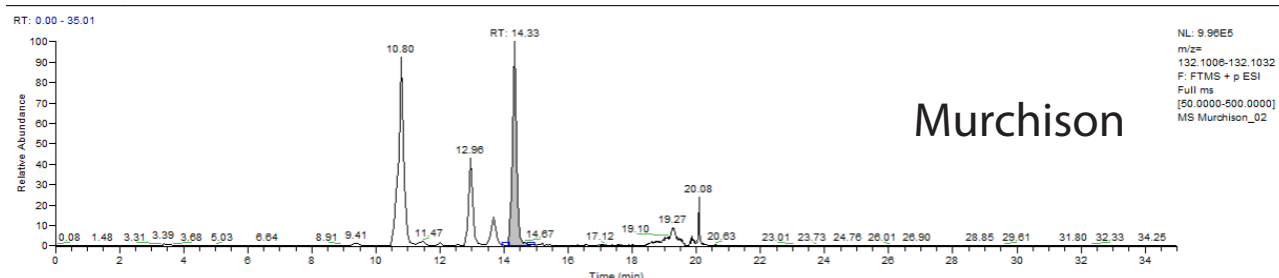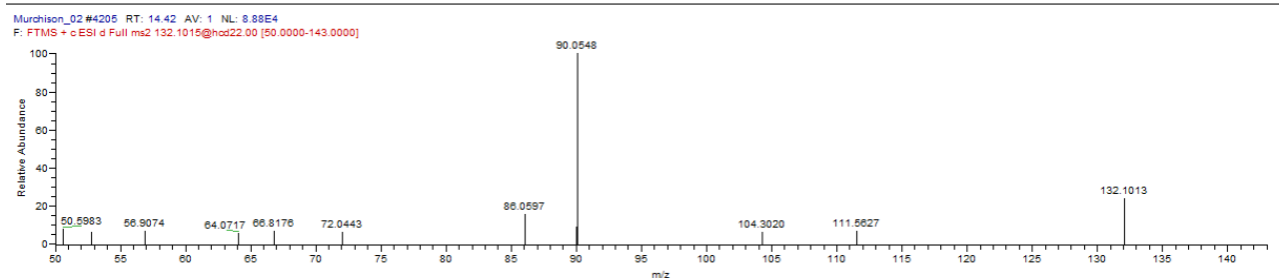

## Figure S1c. Tandem Mass Spectrometry (MS<sup>2</sup>) data for serine (as an isopropyl ester)

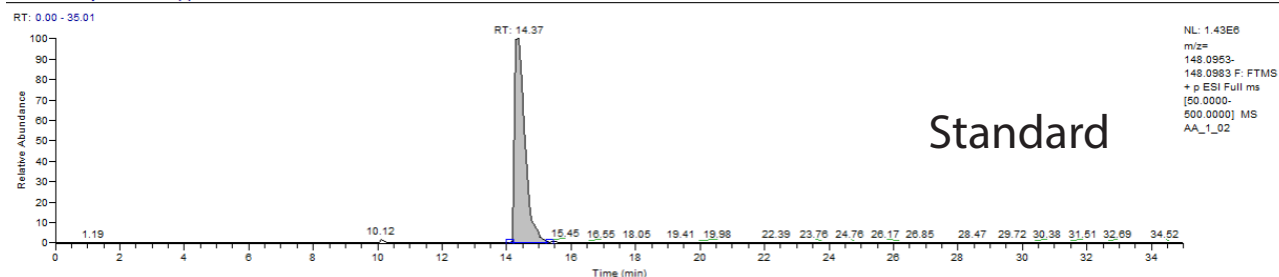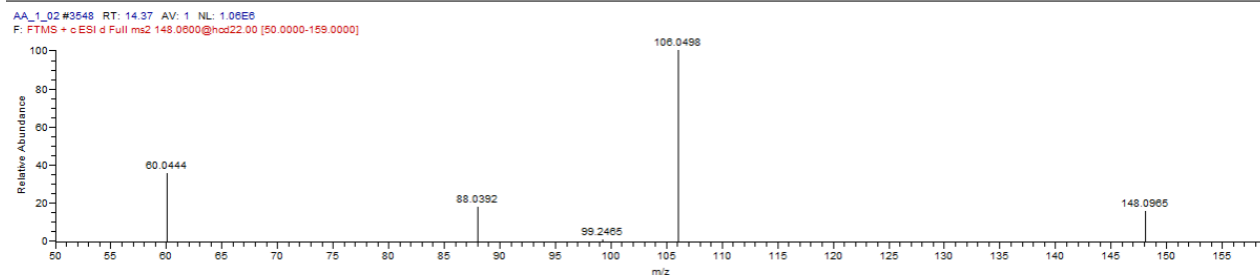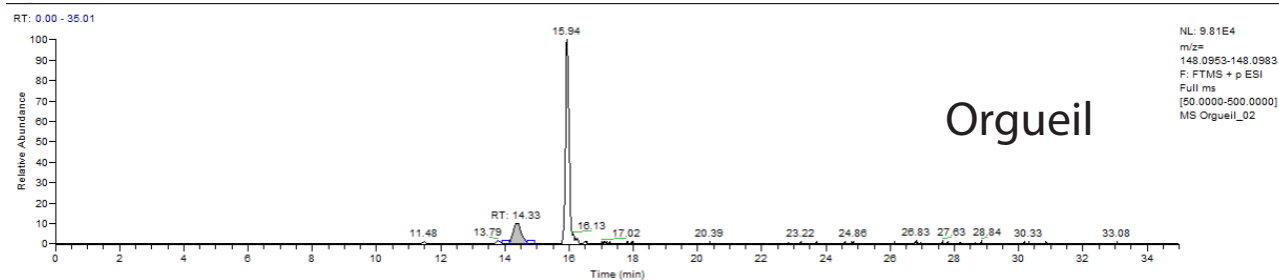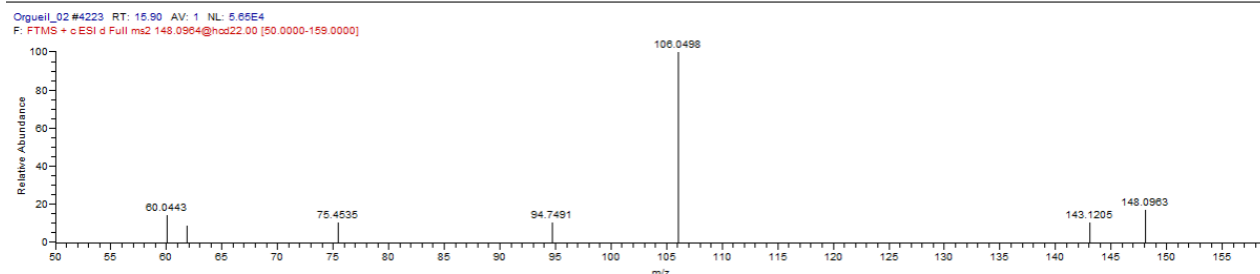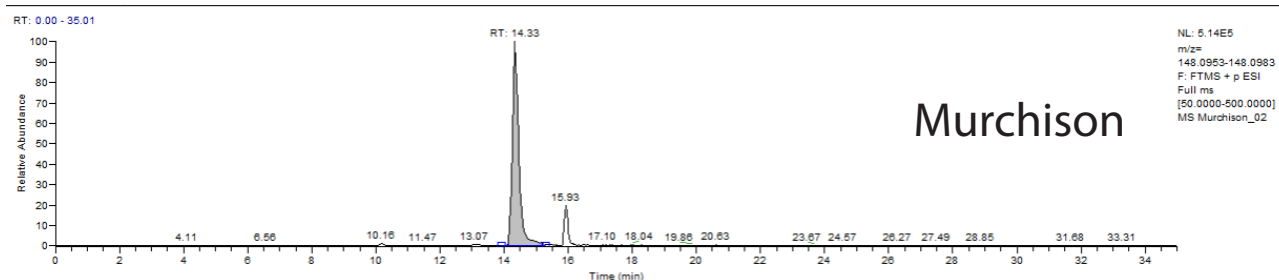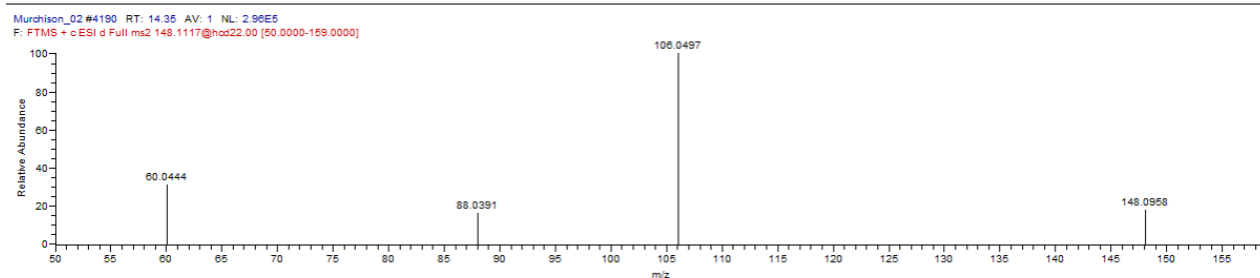

**Figure S1d.** Tandem Mass Spectrometry (MS<sup>2</sup>) data for **threonine** (as an isoproyl ester)

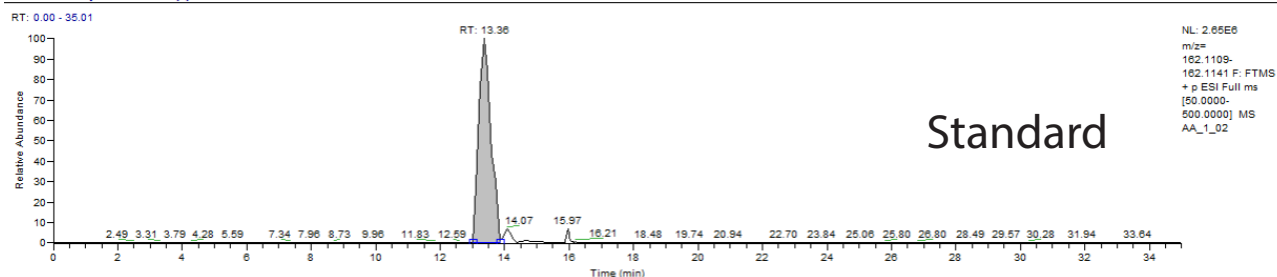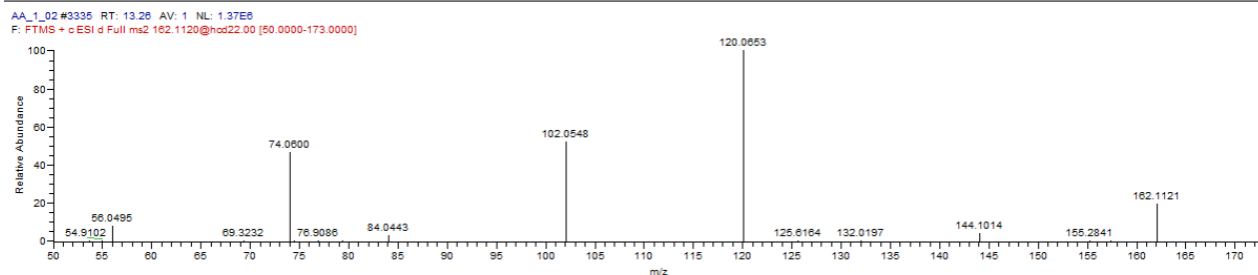

Orgueil

BDL

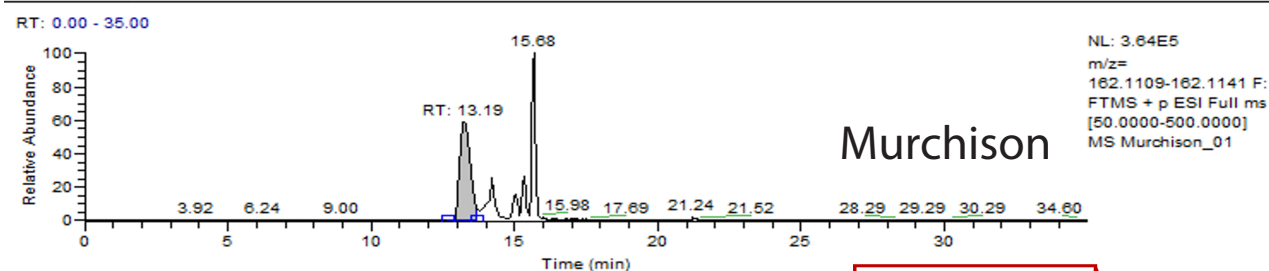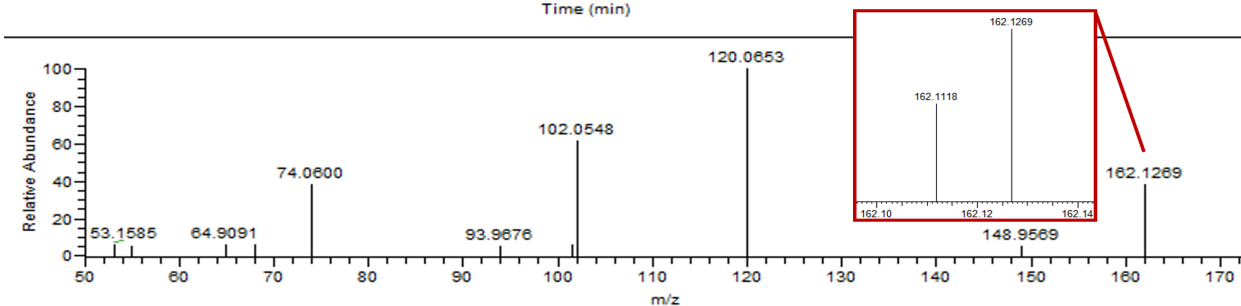



**Figure S1e.** Tandem Mass Spectrometry (MS<sup>2</sup>) data for  **$\alpha$ -aminoisobutyric acid** (as an isopropyl ester)

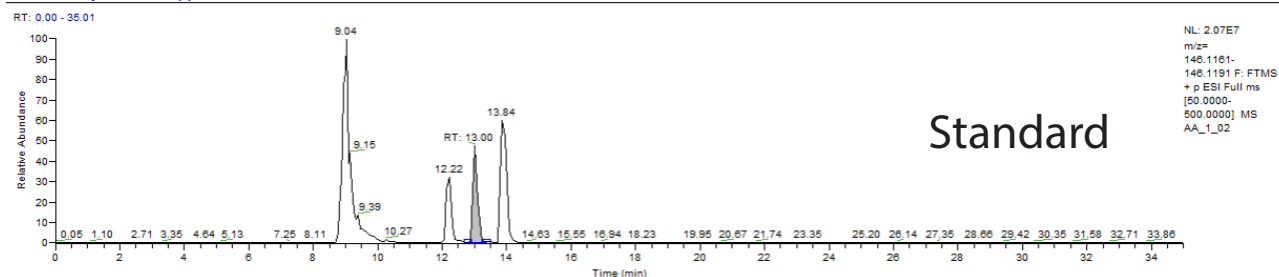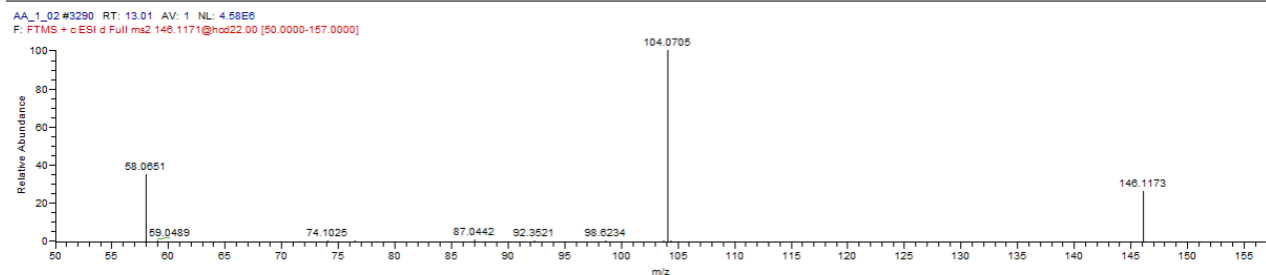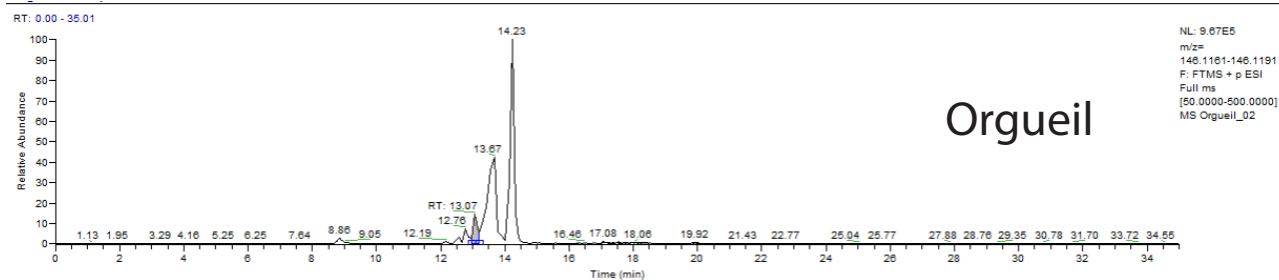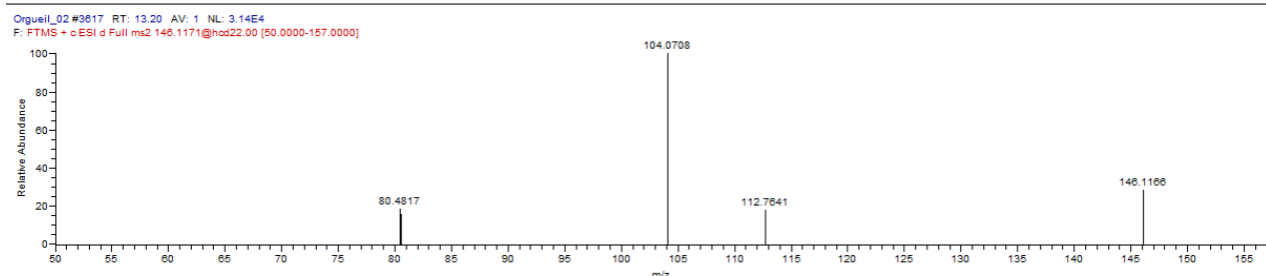

Murchison

No MS<sup>2</sup> data available

## Figure S1f. Tandem Mass Spectrometry (MS<sup>2</sup>) data for aspartic acid (as an isopropyl ester)

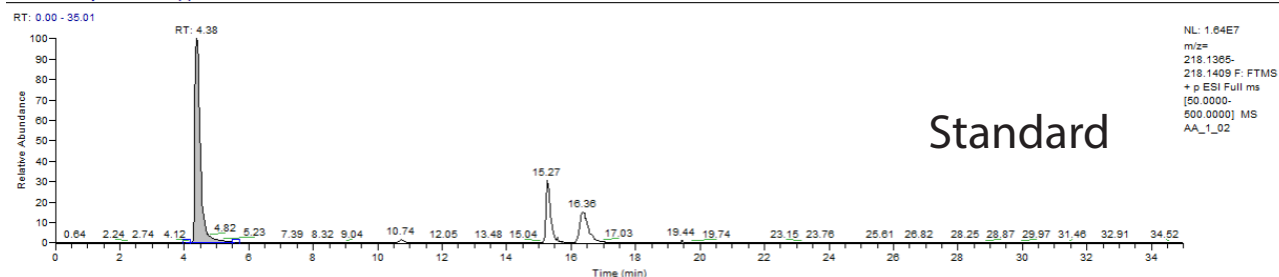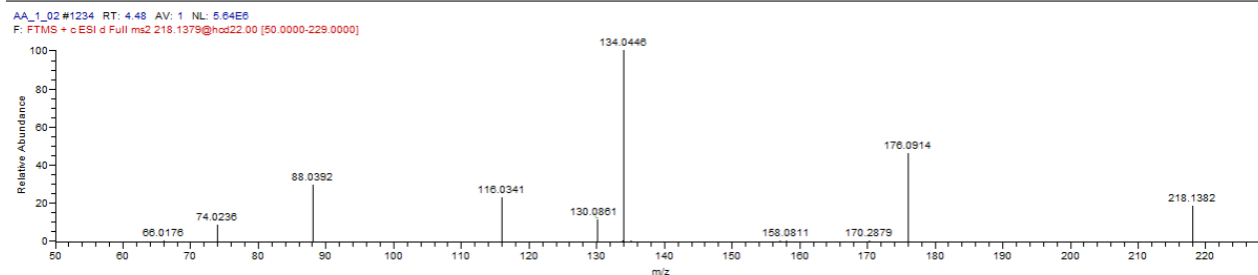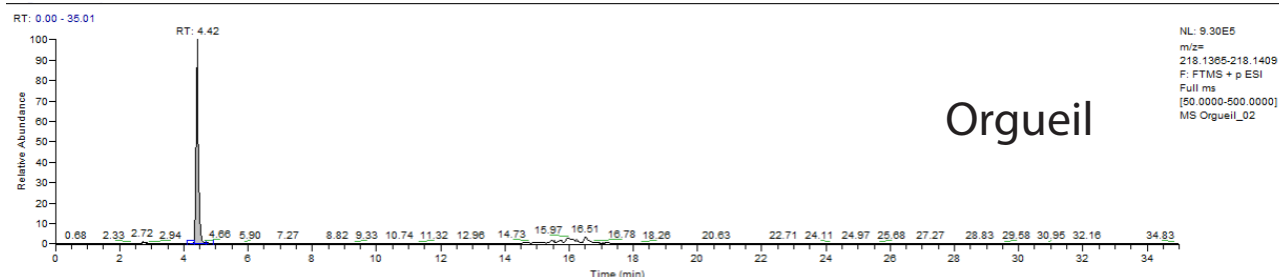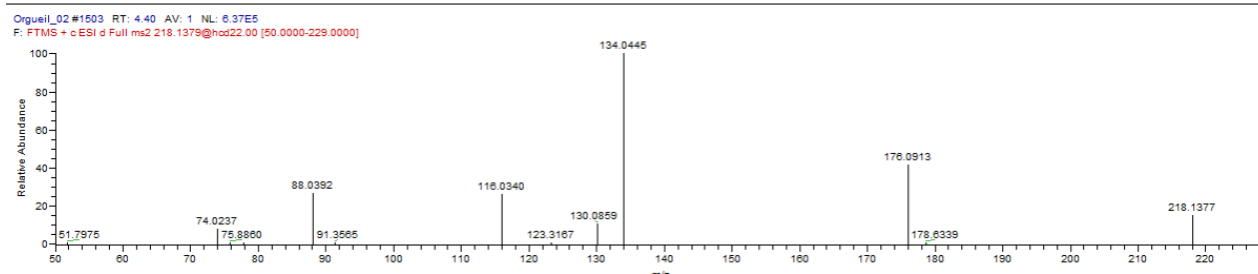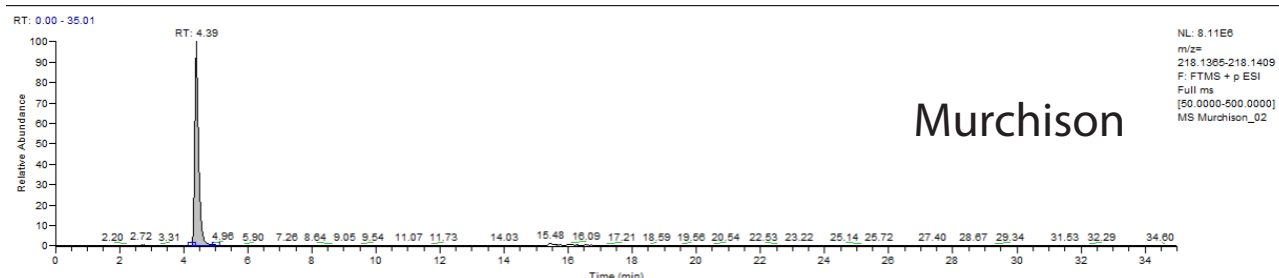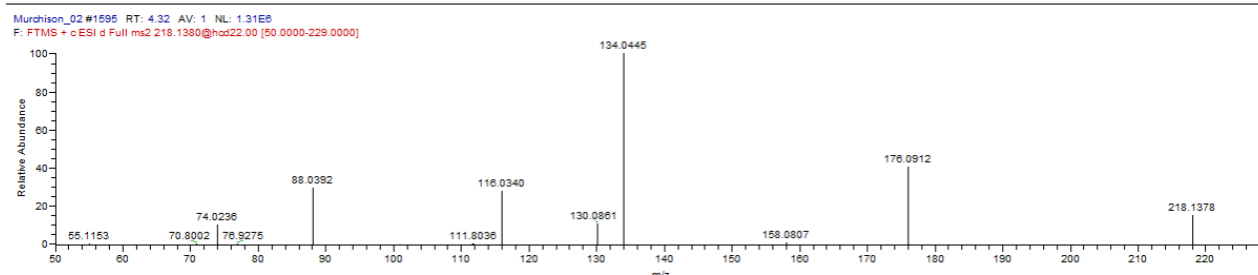

**Figure S1g.** Tandem Mass Spectrometry (MS<sup>2</sup>) data for **valine** (as an isopropyl ester)

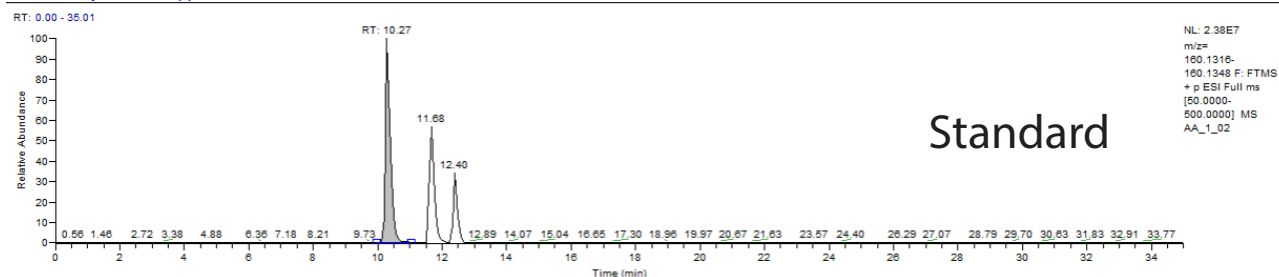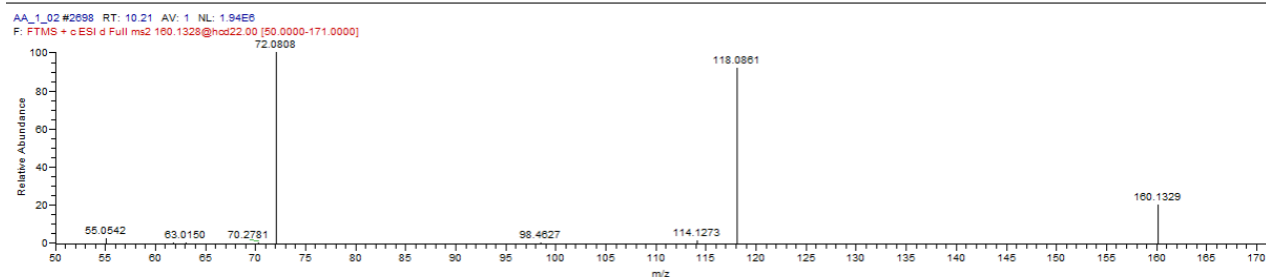

Orgueil

No MS<sup>2</sup> data available

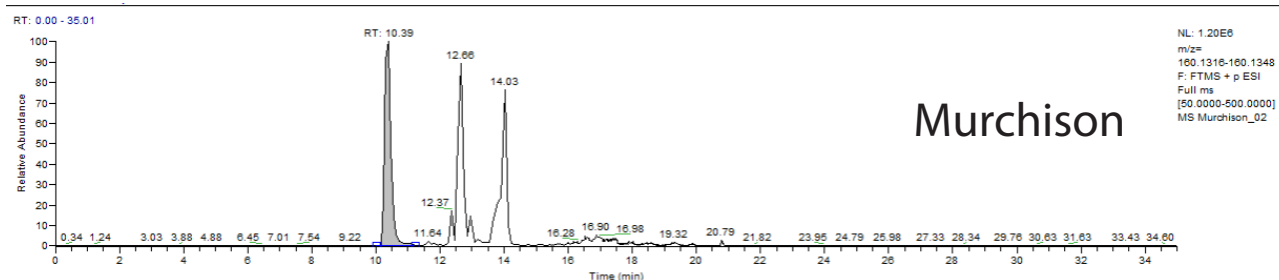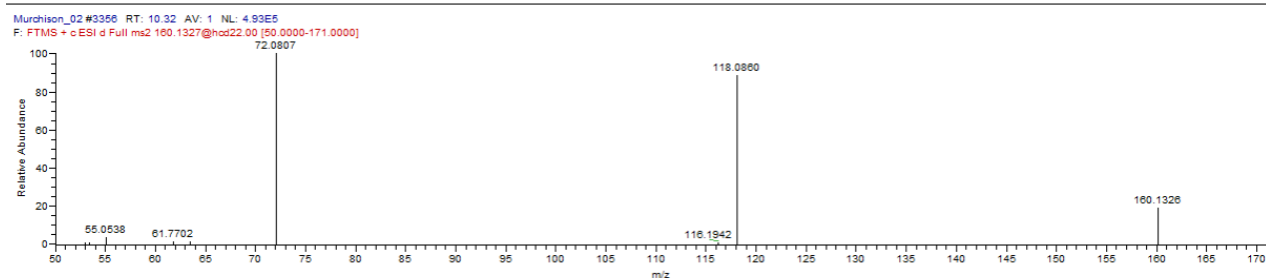

**Figure S1h.** Tandem Mass Spectrometry (MS<sup>2</sup>) data for **isovaline** (as an isoproyl ester)

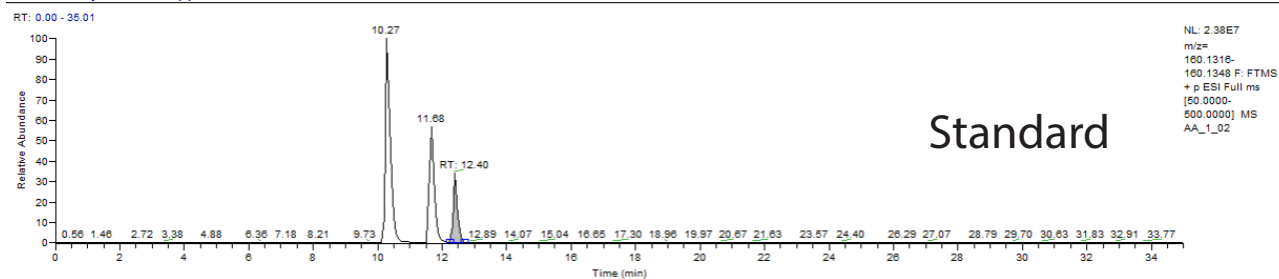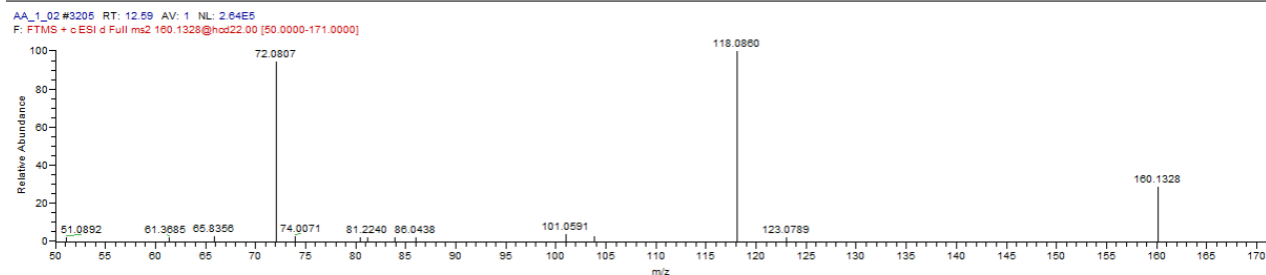

BDL

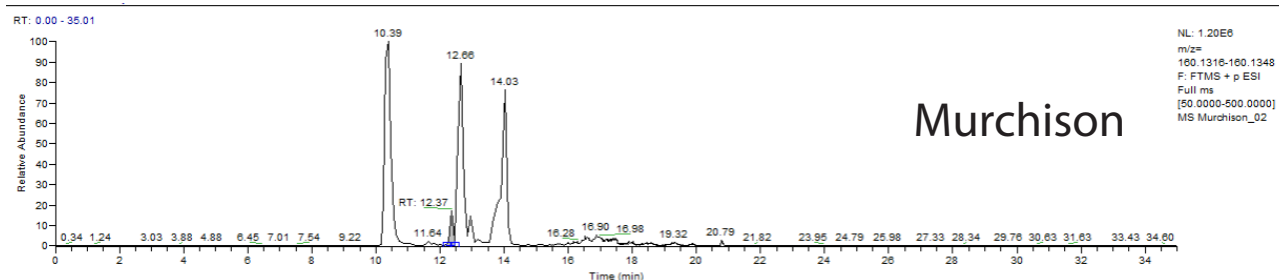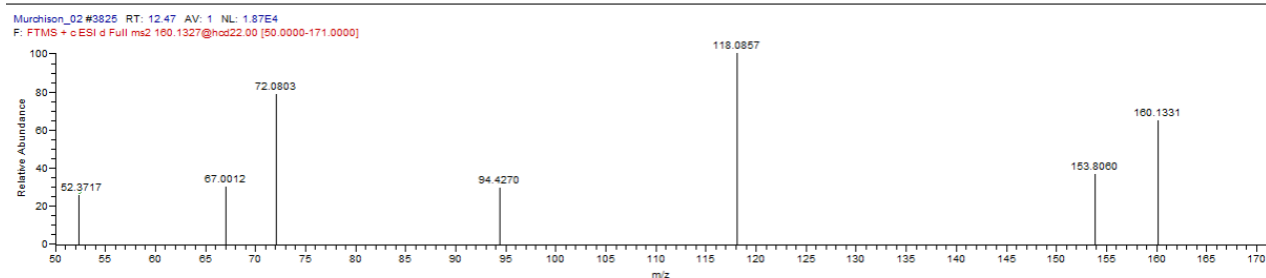

# Figure S1i. Tandem Mass Spectrometry (MS<sup>2</sup>) data for glutamic acid (as an isoproyl ester)

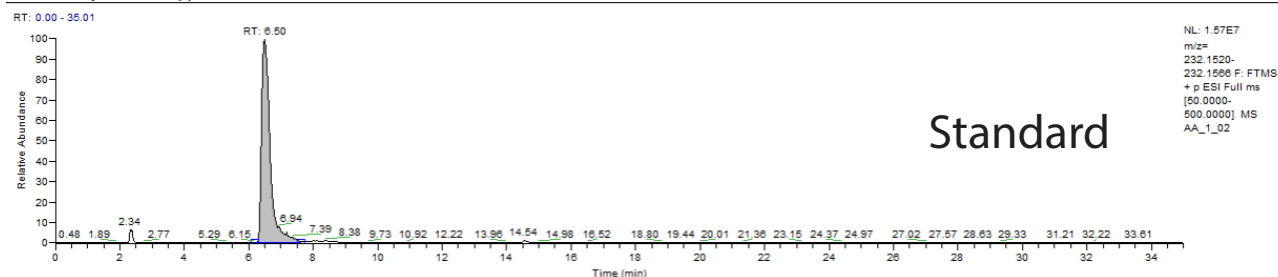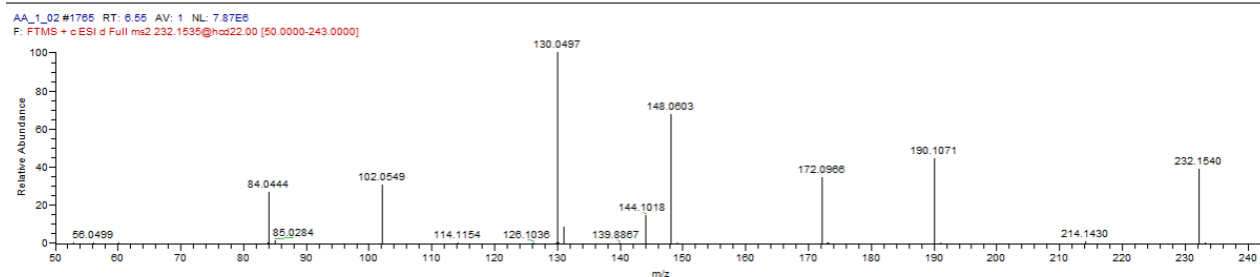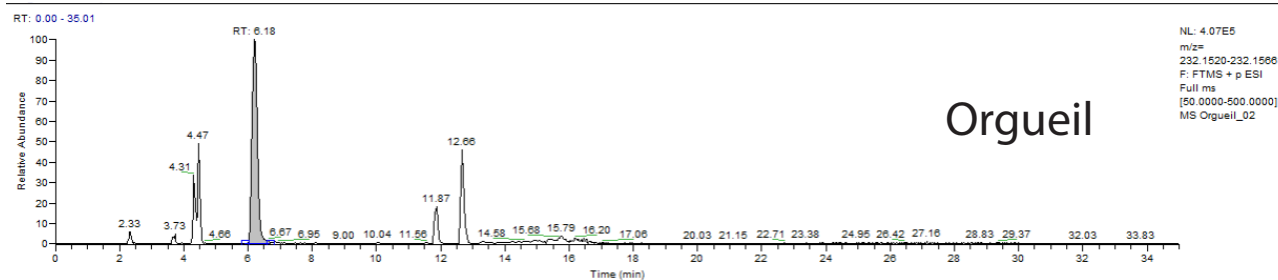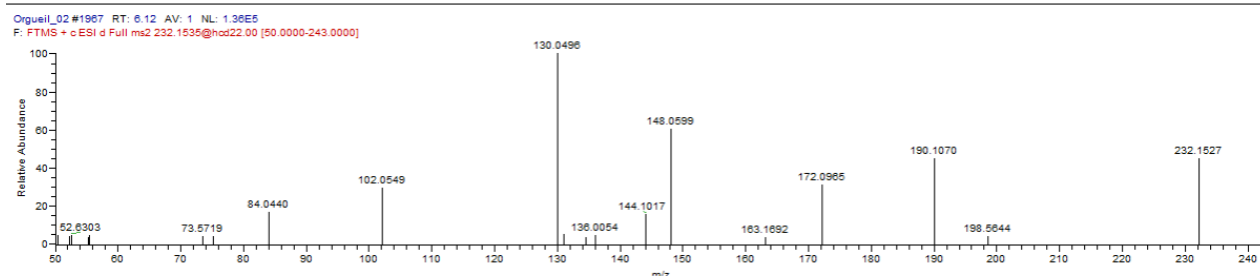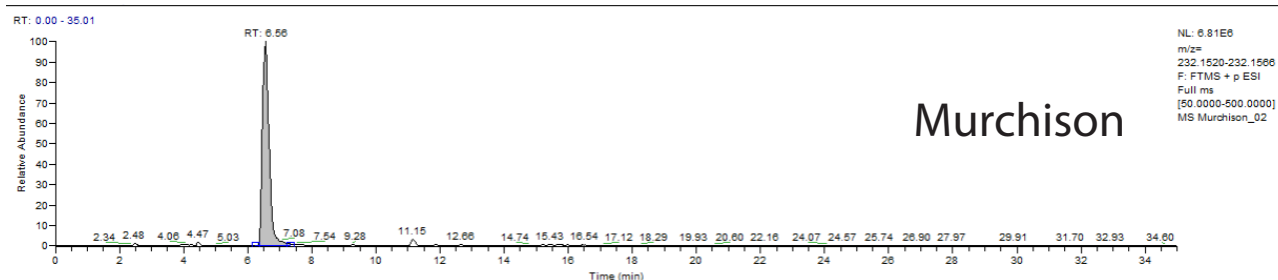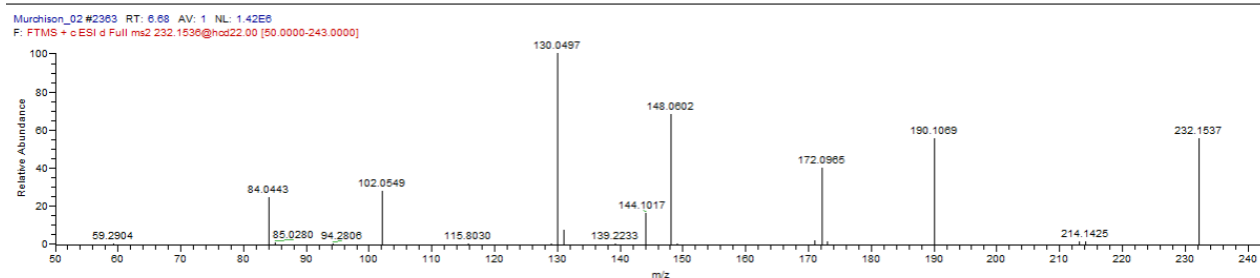

**Figure S1j.** Tandem Mass Spectrometry (MS<sup>2</sup>) data for **leucine** (as an isopropyl ester)

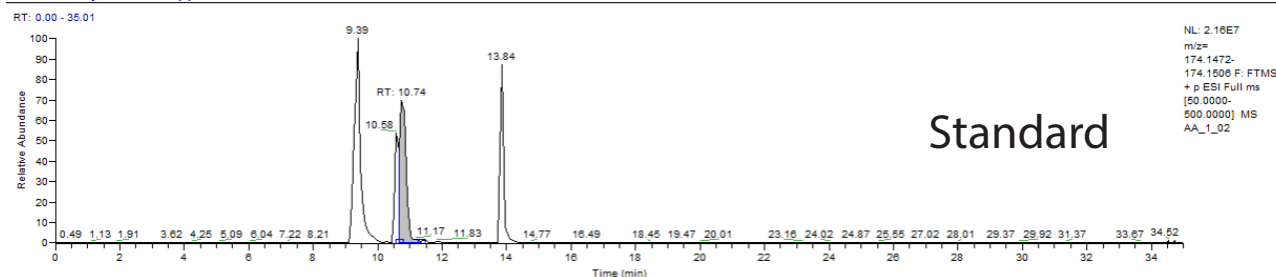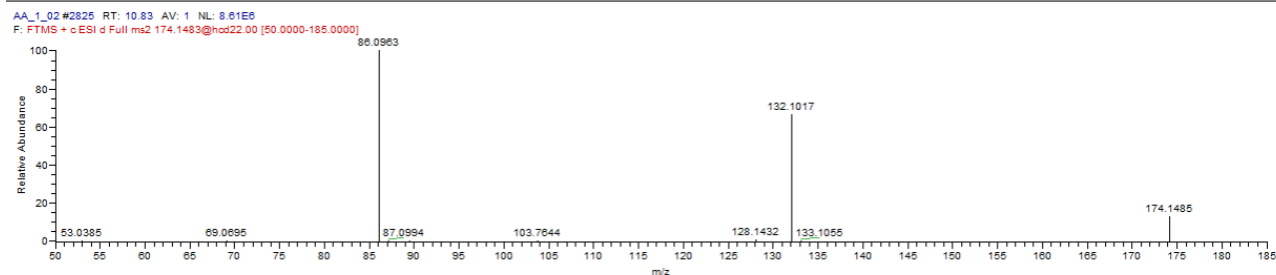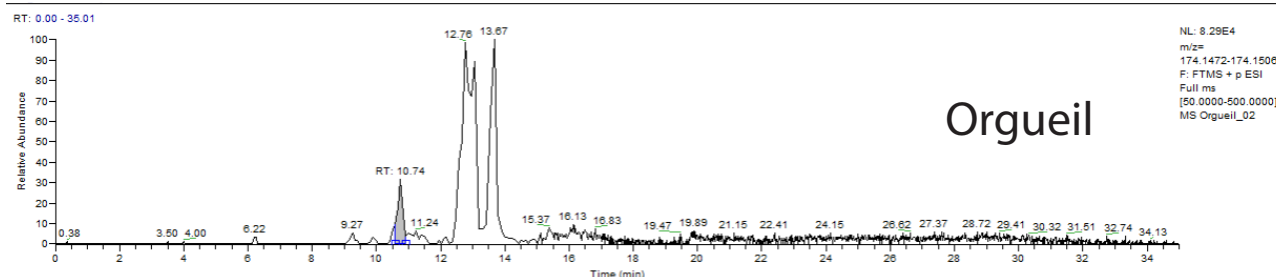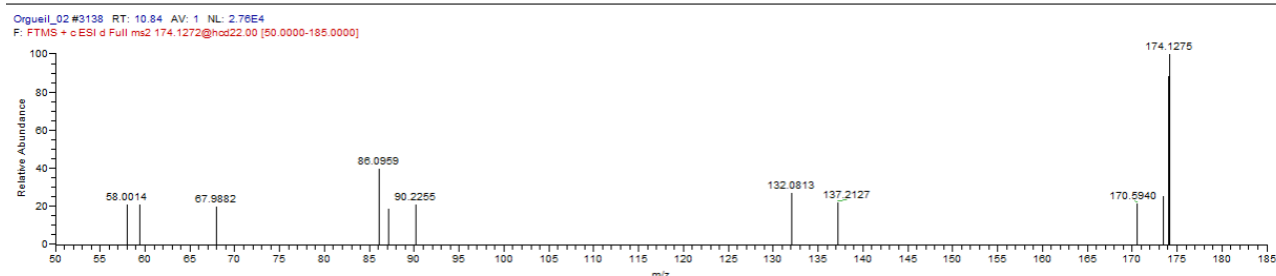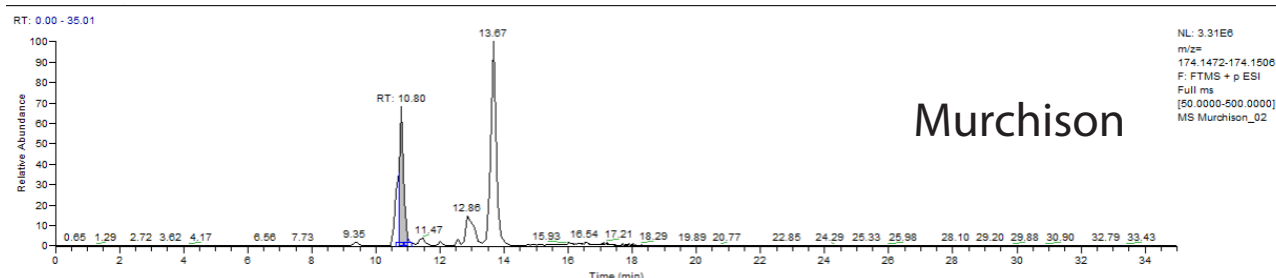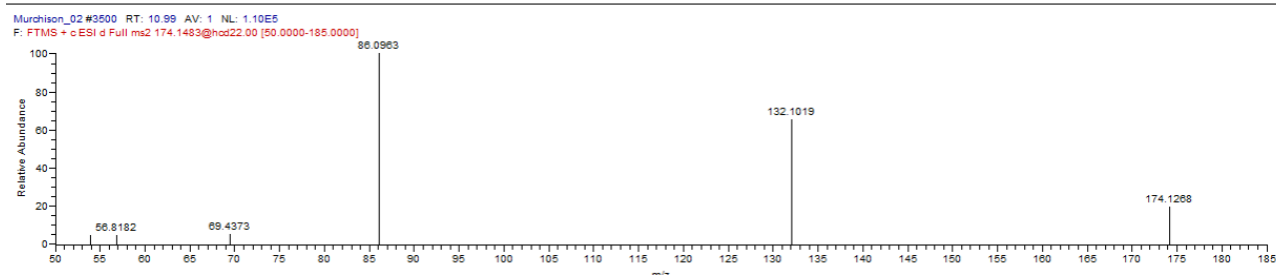

**Figure S1k.** Tandem Mass Spectrometry (MS<sup>2</sup>) data for **isoleucine** (as an isopropyl ester)

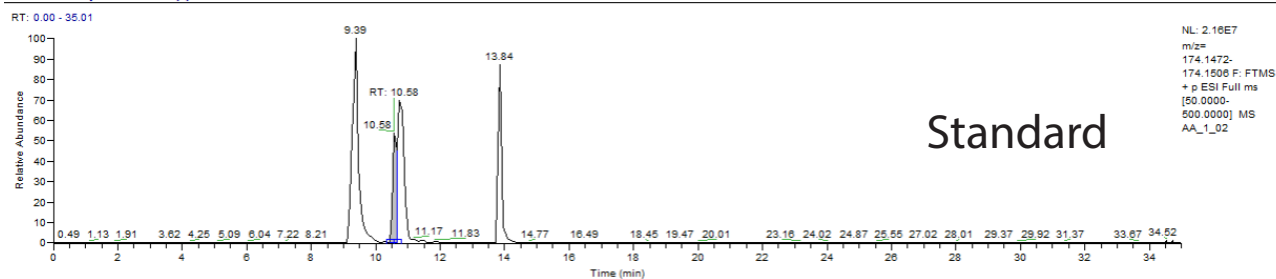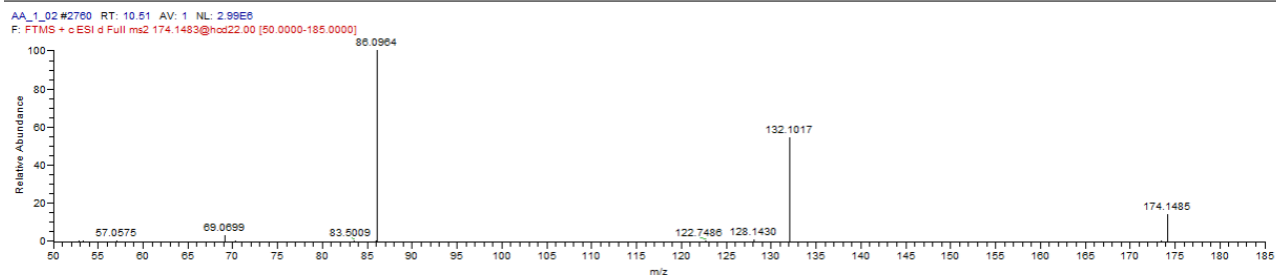

Orgueil

BDL

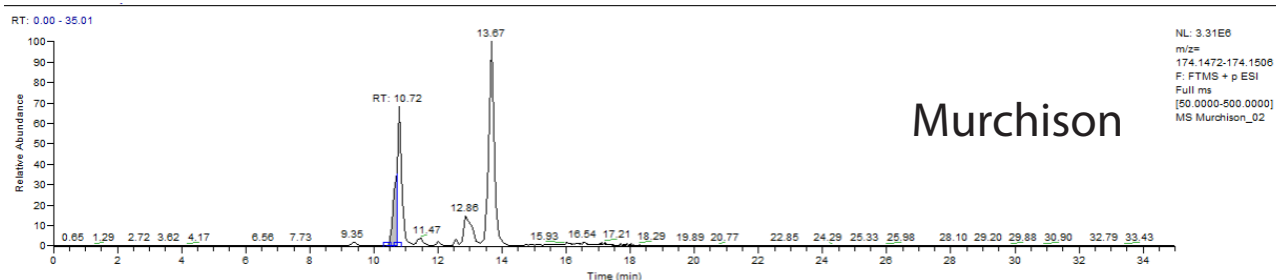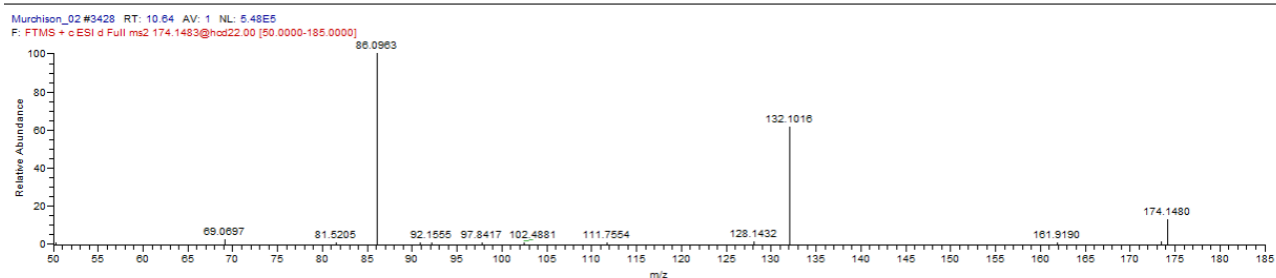

## Figure S1I. Tandem Mass Spectrometry (MS<sup>2</sup>) data for alloseucine (as an isopropyl ester)

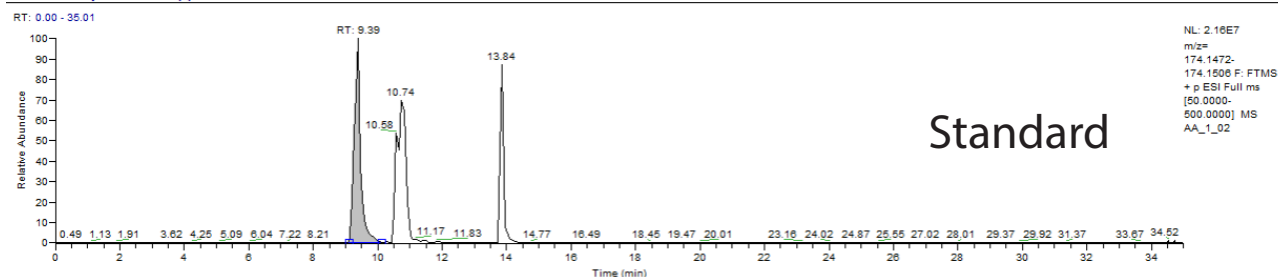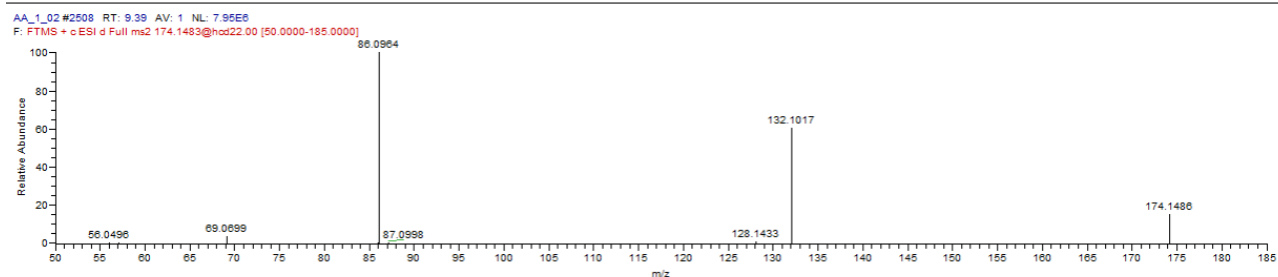

Orgueil

No MS<sup>2</sup> data available

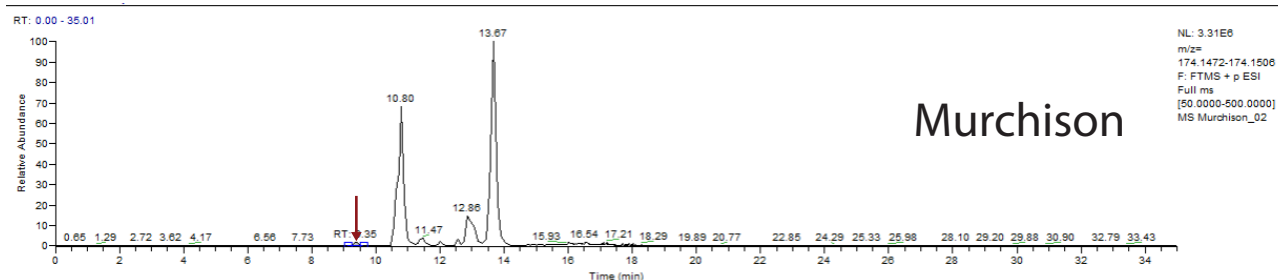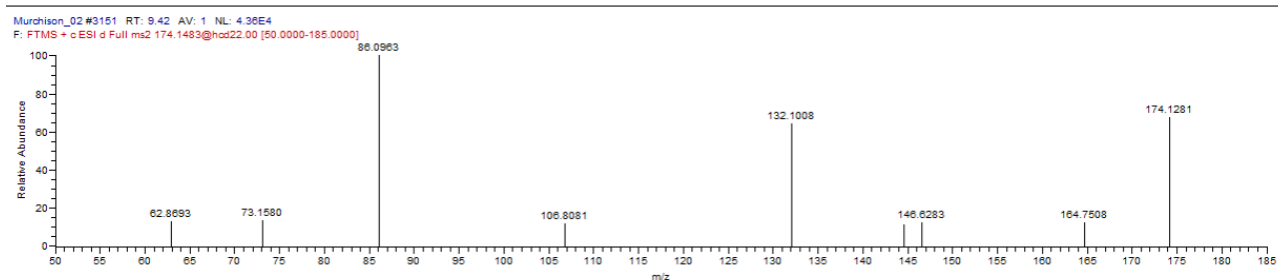



**Figure S1m.** Tandem Mass Spectrometry (MS<sup>2</sup>) data for  **$\alpha$ -aminoadipic acid** (as an isoproyl ester)

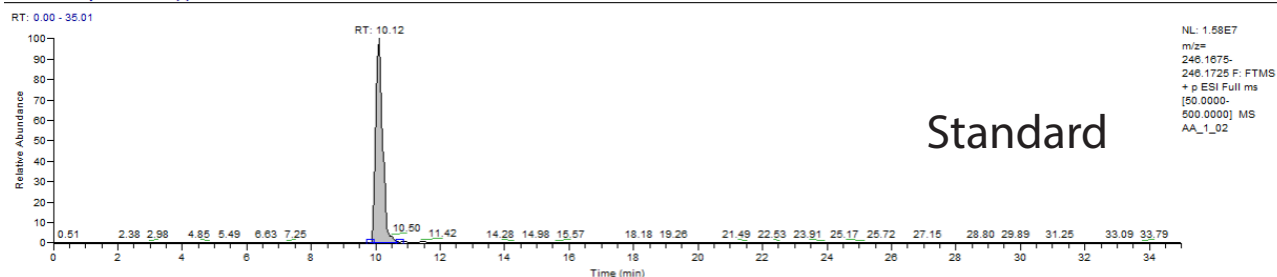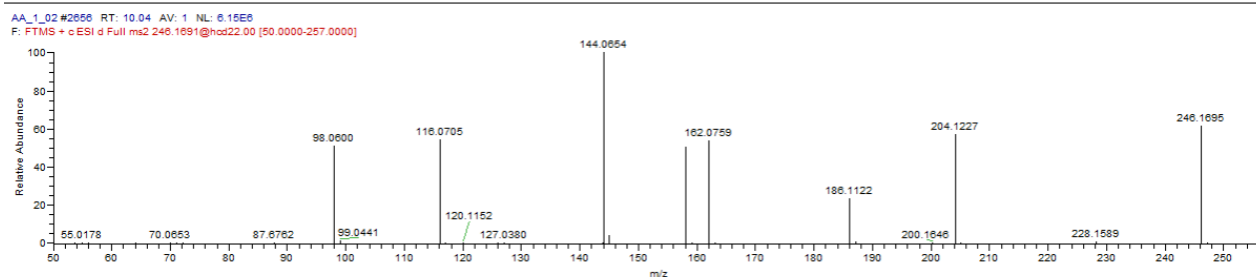

Orgueil

No MS<sup>2</sup> data available

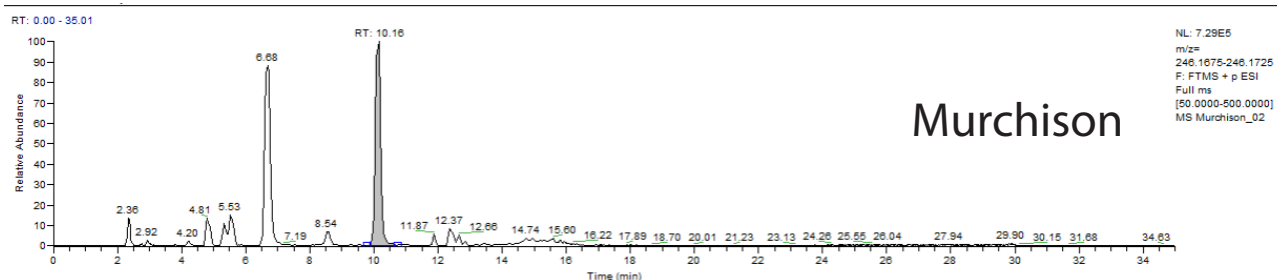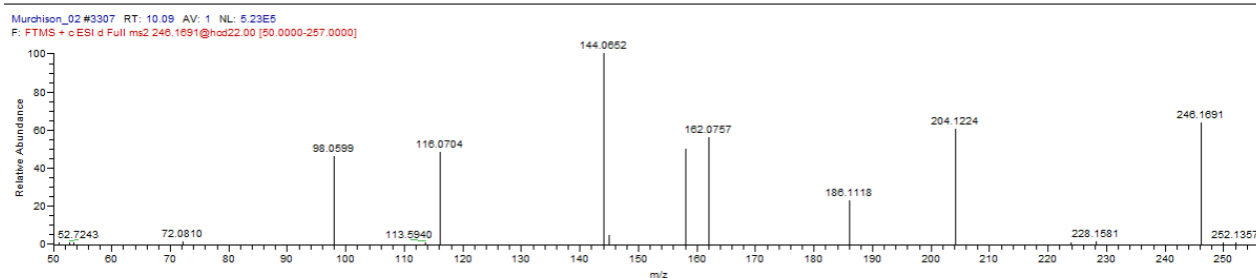

## Figure S1n. Tandem Mass Spectrometry (MS<sup>2</sup>) data for pipecolic acid (as an isopropyl ester)

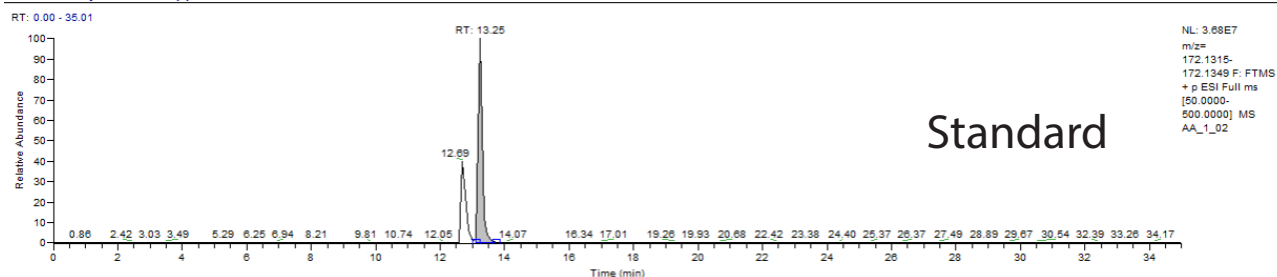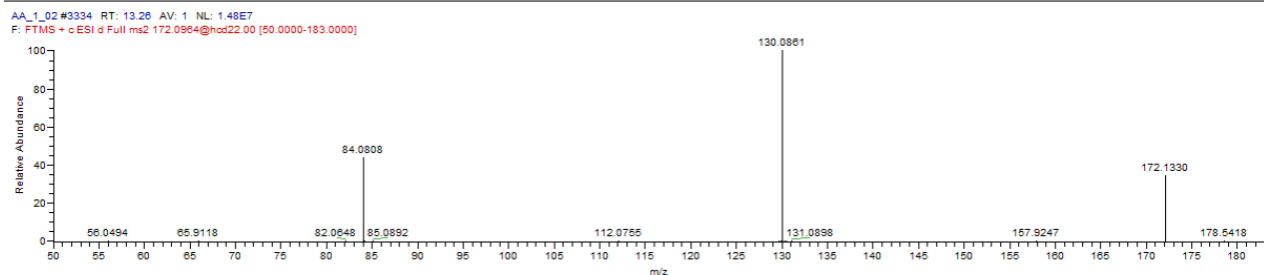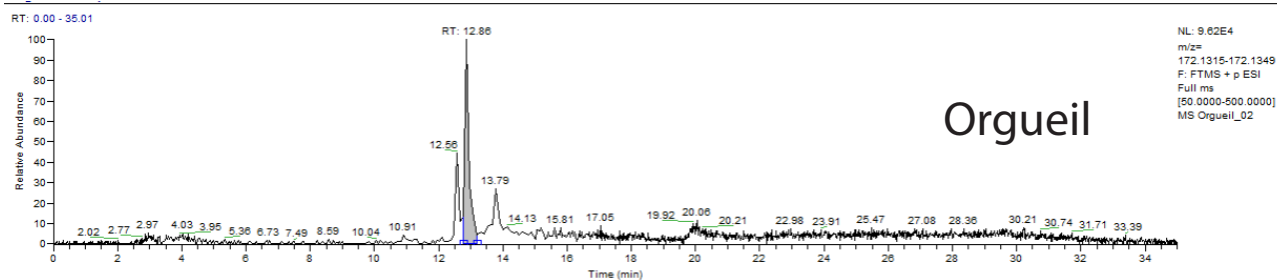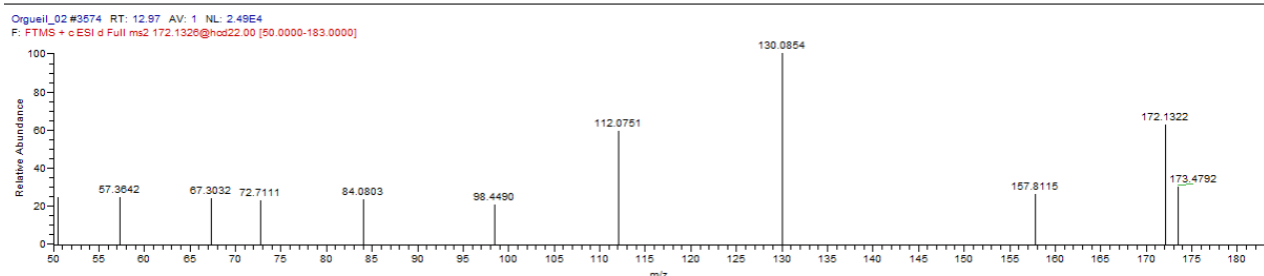

Murchison

No MS<sup>2</sup> data available

**Figure S1o.** Tandem Mass Spectrometry (MS<sup>2</sup>) data for **aminocaproic acid** (as an isoproyl ester)

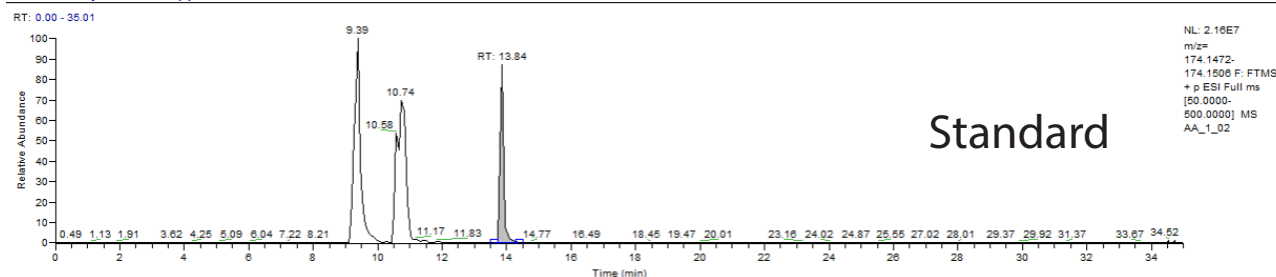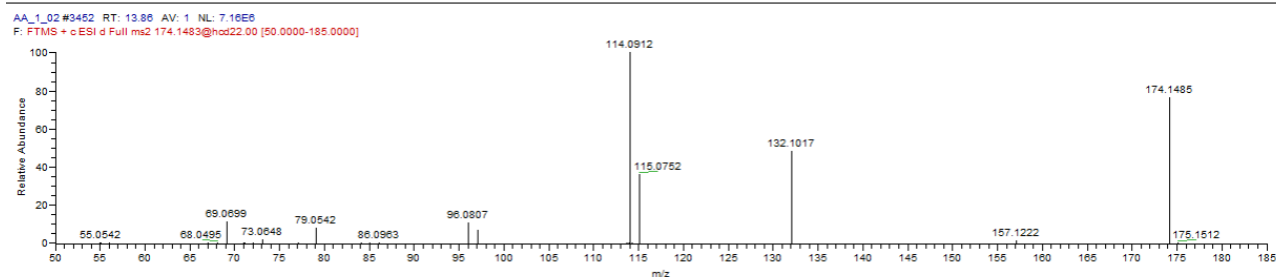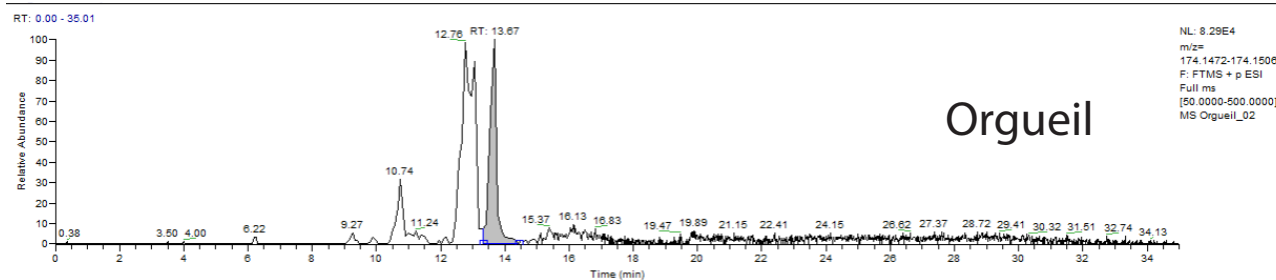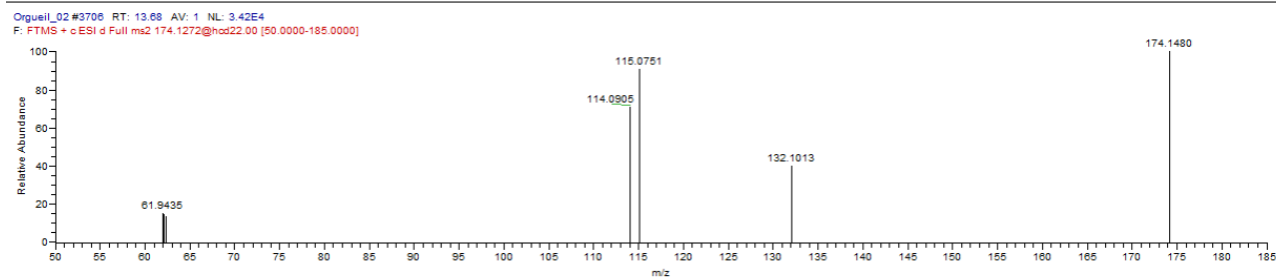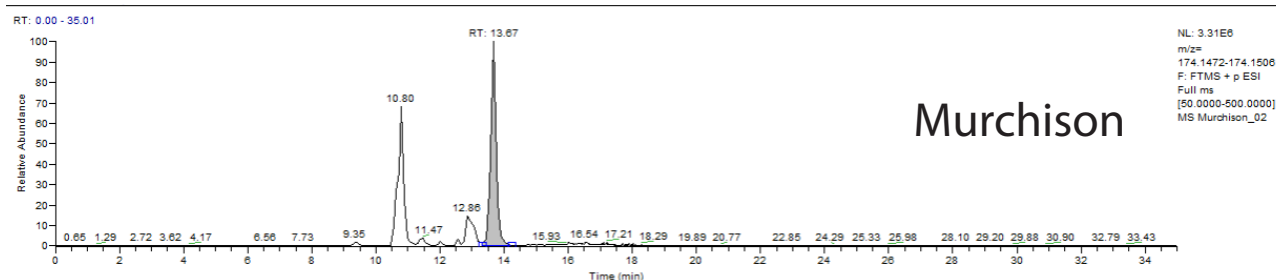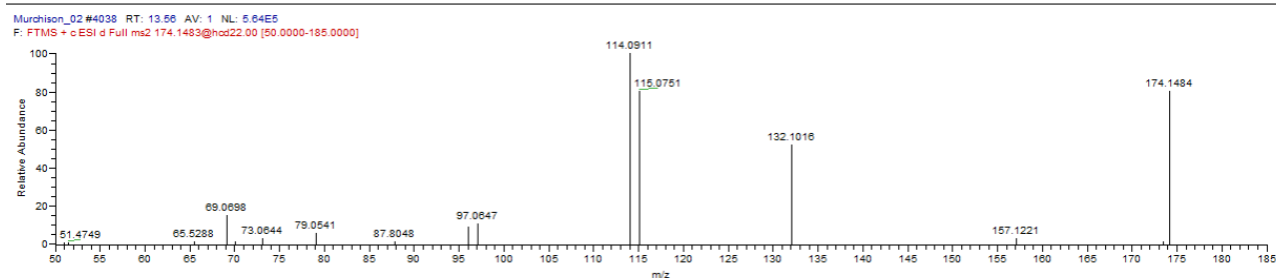

## Figure S1p. Tandem Mass Spectrometry (MS<sup>2</sup>) data for $\alpha$ -aminopimelic acid (as an isopropyl ester)

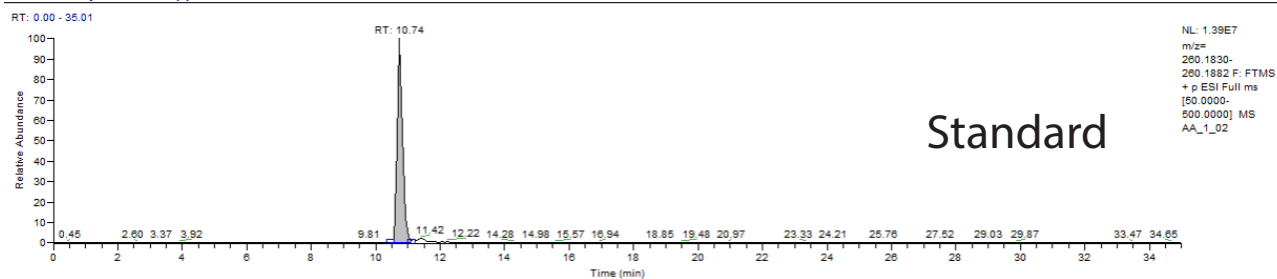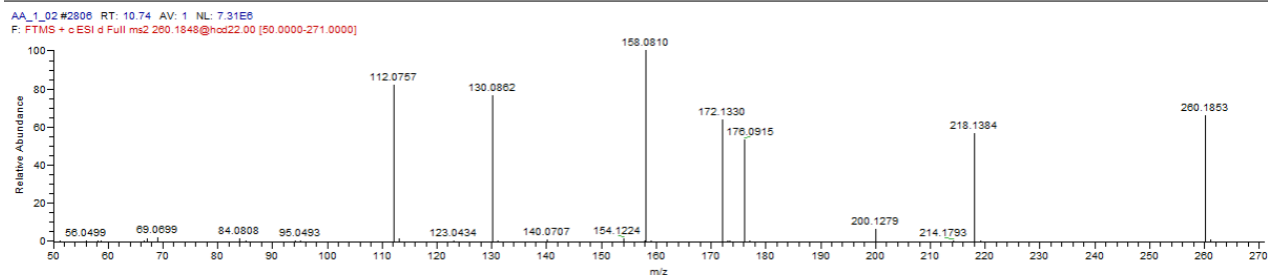

Orgueil

BDL

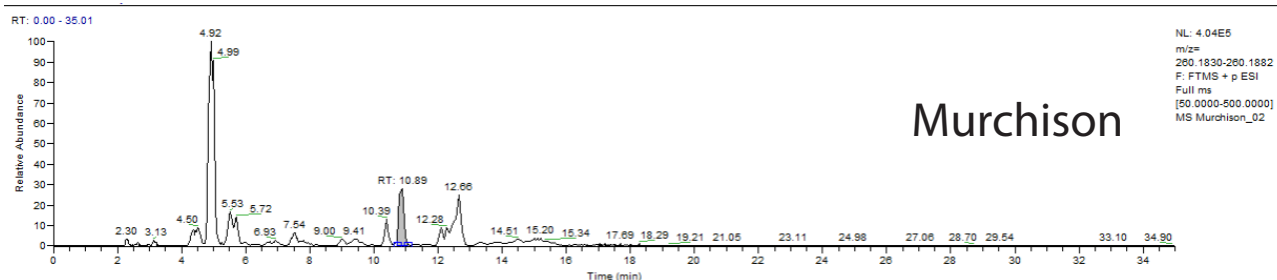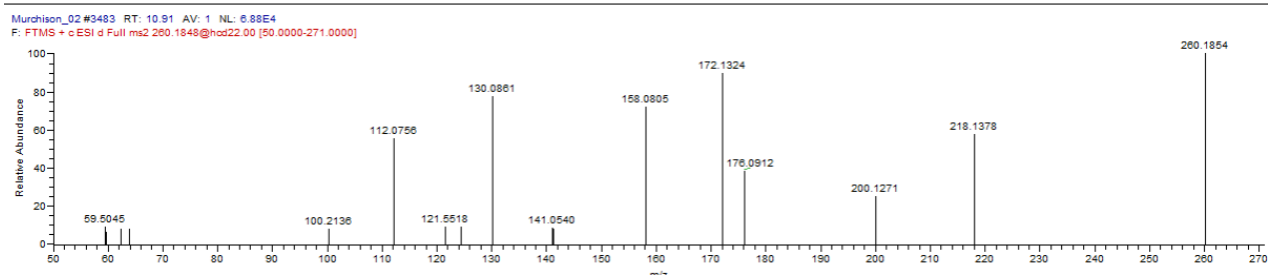

# Figure S1q. Tandem Mass Spectrometry (MS<sup>2</sup>) data for phenylalanine (as an isoproyl ester)

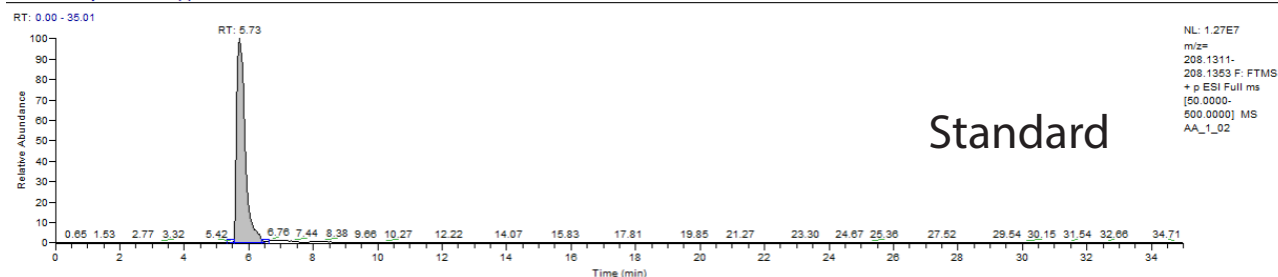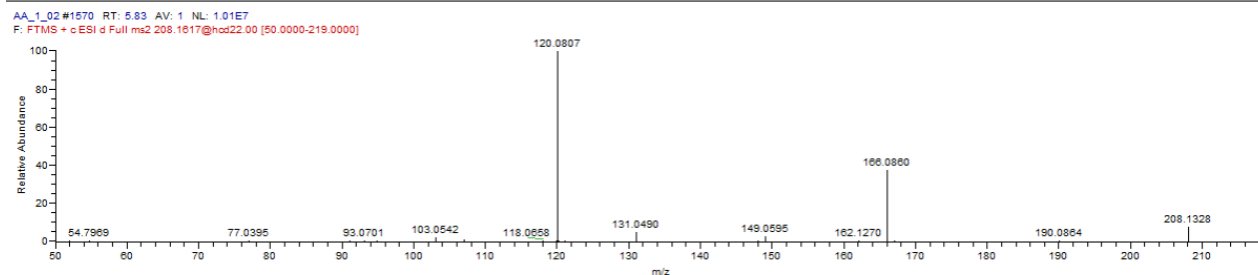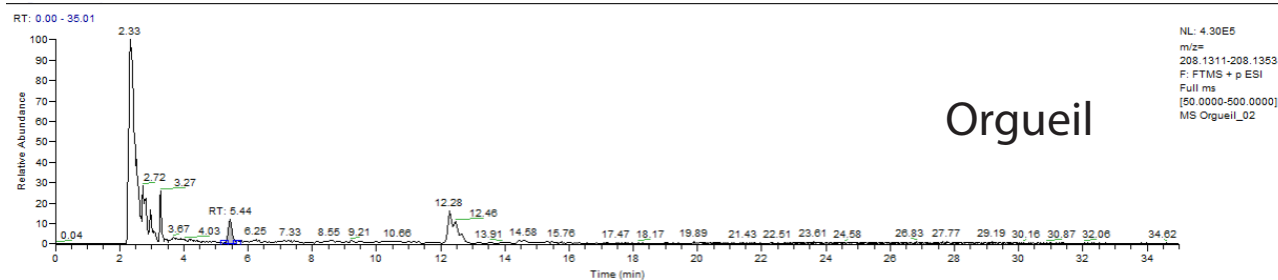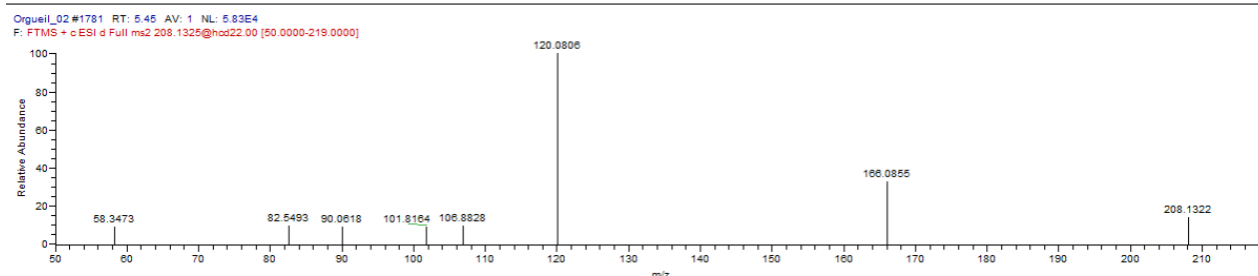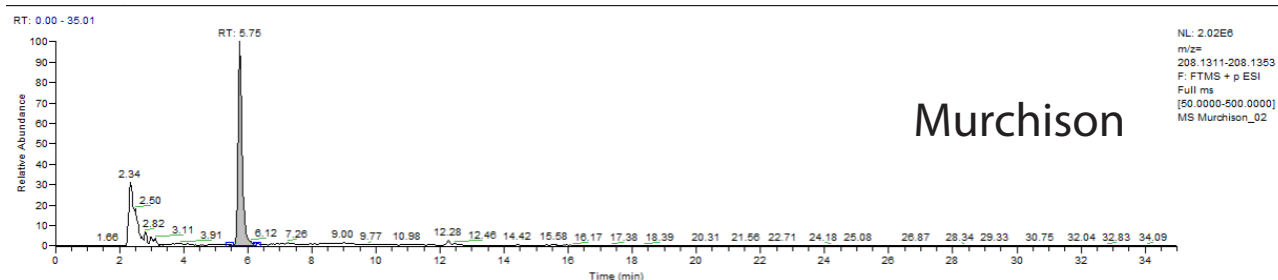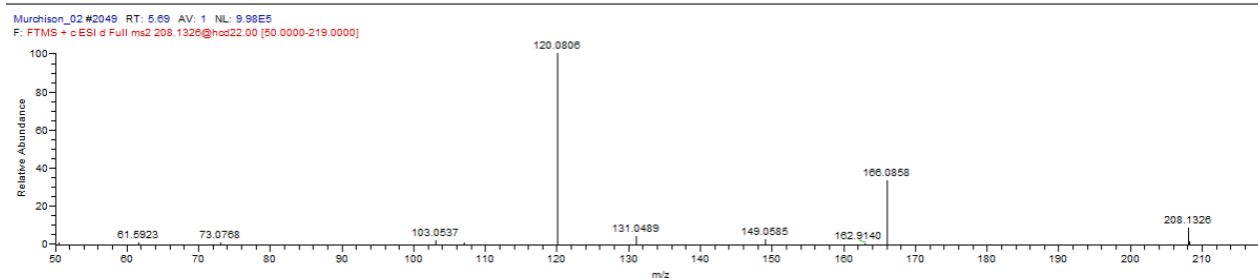

**Figure S1r.** Tandem Mass Spectrometry (MS<sup>2</sup>) data for **tyrosine** (as an isopropyl ester)

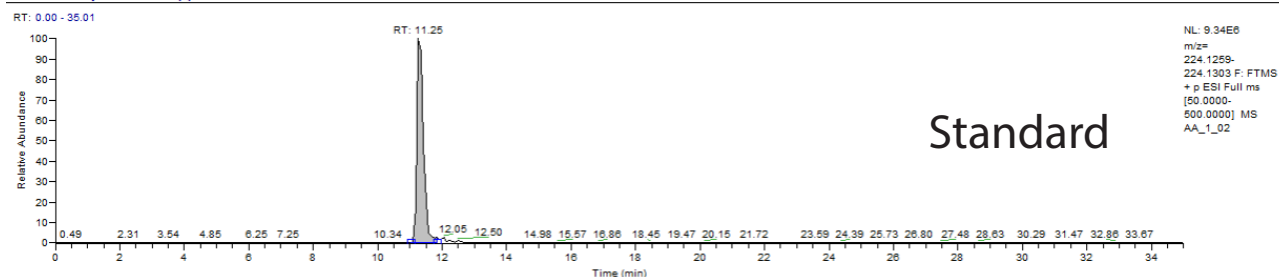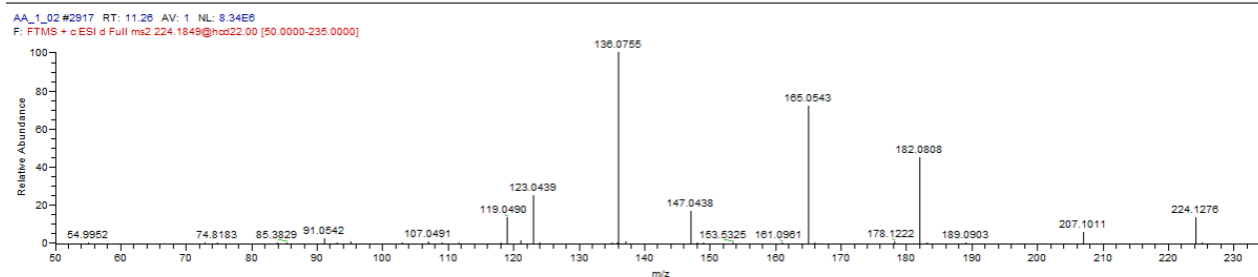

Orgueil

No MS<sup>2</sup> data available

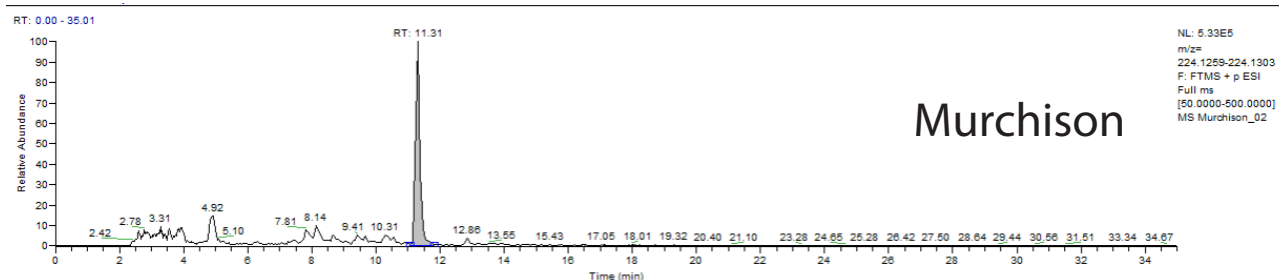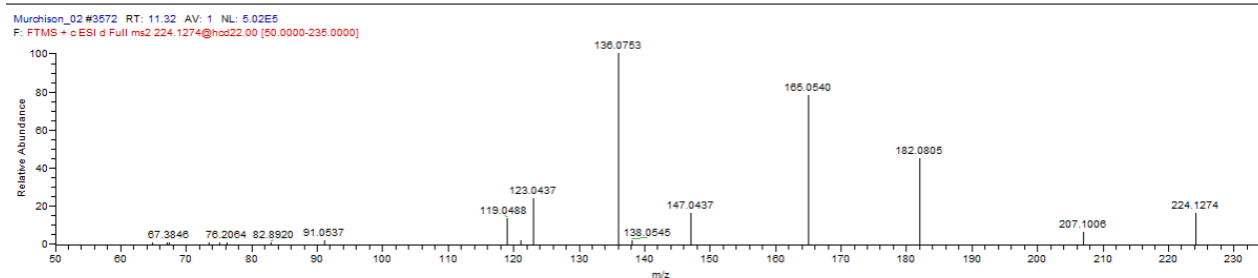

Supplement: Supplementary file 1 [file supplementary]
